# Supplementary material
Source: Springer Nature journal article supplement (https://www.springermedizin.de/resource/supplementary/12891_2007_475_MOESM4_ESM.pdf/9511520)

Cup

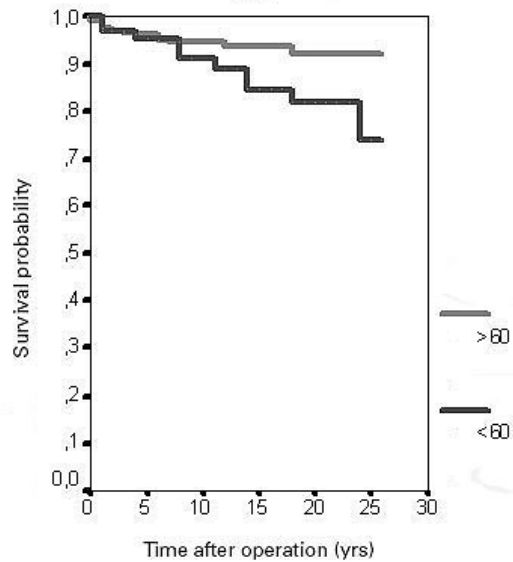

Stem

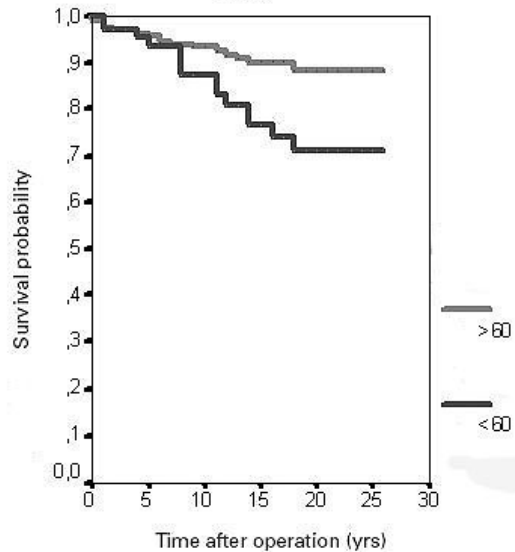

Supplement: MOESM4 [file 9511520]
